# Supplementary material for: Electronic structure of cyclodextrin–carbon nanotube composite films
Source: Royal Society of Chemistry journal article supplement (doi:10.1039/c6ra26900a), 2017-01-01
Supplement: c6ra26900a1.pdf [file c6ra26900a1.pdf]

## Electronic structure of cyclodextrin-carbon nanotube composite films

Hae Kyung Jeong<sup>1,\*</sup>, Elena Echeverria<sup>2</sup>, Priyanka Chakraborti<sup>2</sup>, Hien Ngoc Thi Le<sup>1</sup>, and

P. A. Dowben<sup>2,\*</sup>

<sup>1</sup> Department of Physics, Institute of Basic Science, Daegu University, Gyeongsan 712-

714, Korea (ROK)

<sup>2</sup> Department of Physics and Astronomy, University of Nebraska-Lincoln, 68588-0299

(USA)

---

\* Corresponding author. Tel/Fax: +82 53 850 6438/6439 (H. K. Jeong); Tel/Fax: +01 402 472 9838/6148 (P. A. Dowben).

Email address: [outron@gmail.com](mailto:outron@gmail.com) (H. K. Jeong), [pdowben@unl.edu](mailto:pdowben@unl.edu) (P.A. Dowben)

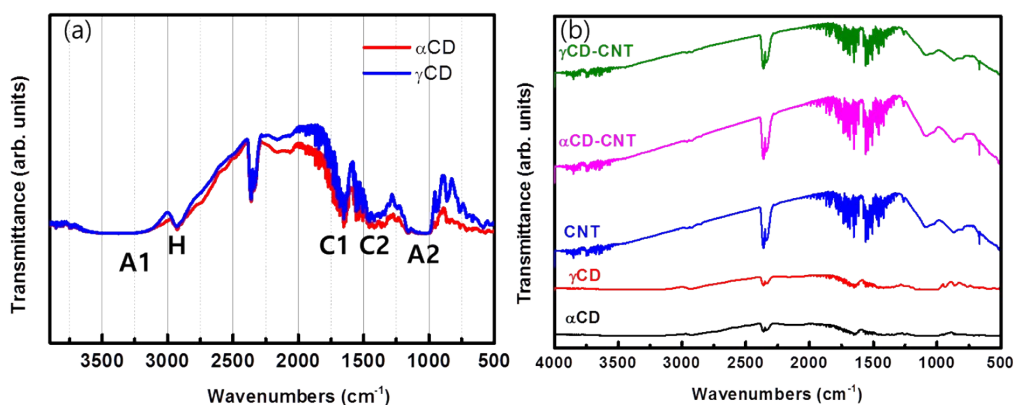

Fig. S1: A selection of the FTIR spectra of (a)  $\alpha$ CD and  $\gamma$ CD, and (b) stacked as a comparison with the reference cyclodextrin IR spectra.

Fig. S1 (a) shows the Fourier transform infrared (FTIR) spectra of  $\alpha$ CD and  $\gamma$ CD. They are very similar. We can see the alcohol peaks near 3700  $\text{cm}^{-1}$  (peak A1) and 1150-1050  $\text{cm}^{-1}$  (peak A2). Peak A1 is from O-H stretch vibration of the alcohol, and peak A2 is due to C-O stretch vibration. Peak H refers C-H stretch vibration, and C1 and C2 present C=C stretch vibrations from alkene and aromatic, respectively. The FTIR spectra are more intense when the cyclodextrin is combined with the CNT, as shown in Fig. S1. The composite materials have stronger dipole oscillator strengths. The CNT has similar functional groups like CD because of partial oxidation and because of ambient contaminants that exhibit the characteristic alcohol peaks (Peak A1 and Peak A2), but not the characteristic CD IR absorption bands, belonging to the valence vibrations of the

C- H bonds in the CH and CH<sub>2</sub> groups at 2926 cm<sup>-1</sup>.

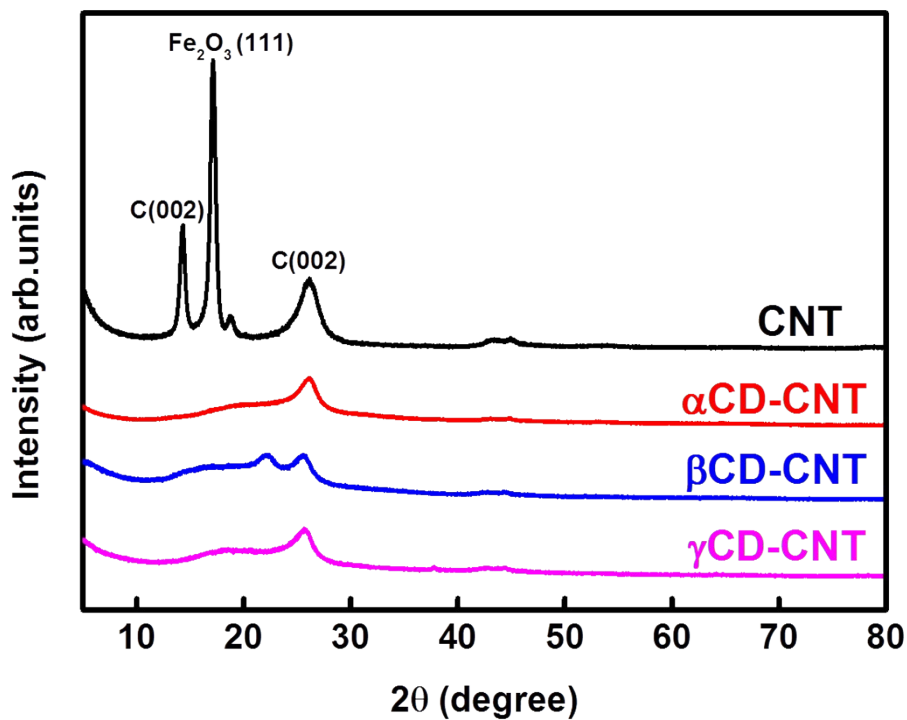

Fig. S2. XRD results of the samples.

The  $\theta$ - $2\theta$  X-ray diffraction (XRD) results of the samples are illustrated. The CNT has the graphitic structure of (002) near 26 degree (1<sup>st</sup> order) and 15 degree (2<sup>nd</sup> order) with the indications of catalysts (Fe<sub>2</sub>O<sub>3</sub>) evident in the XRD results. The XRD spectra of the CD-CNT composites are similar because of the absence of cyclodextrin crystallinity. The additional diffraction lines associated with cyclodextrin, although broad, are evident.

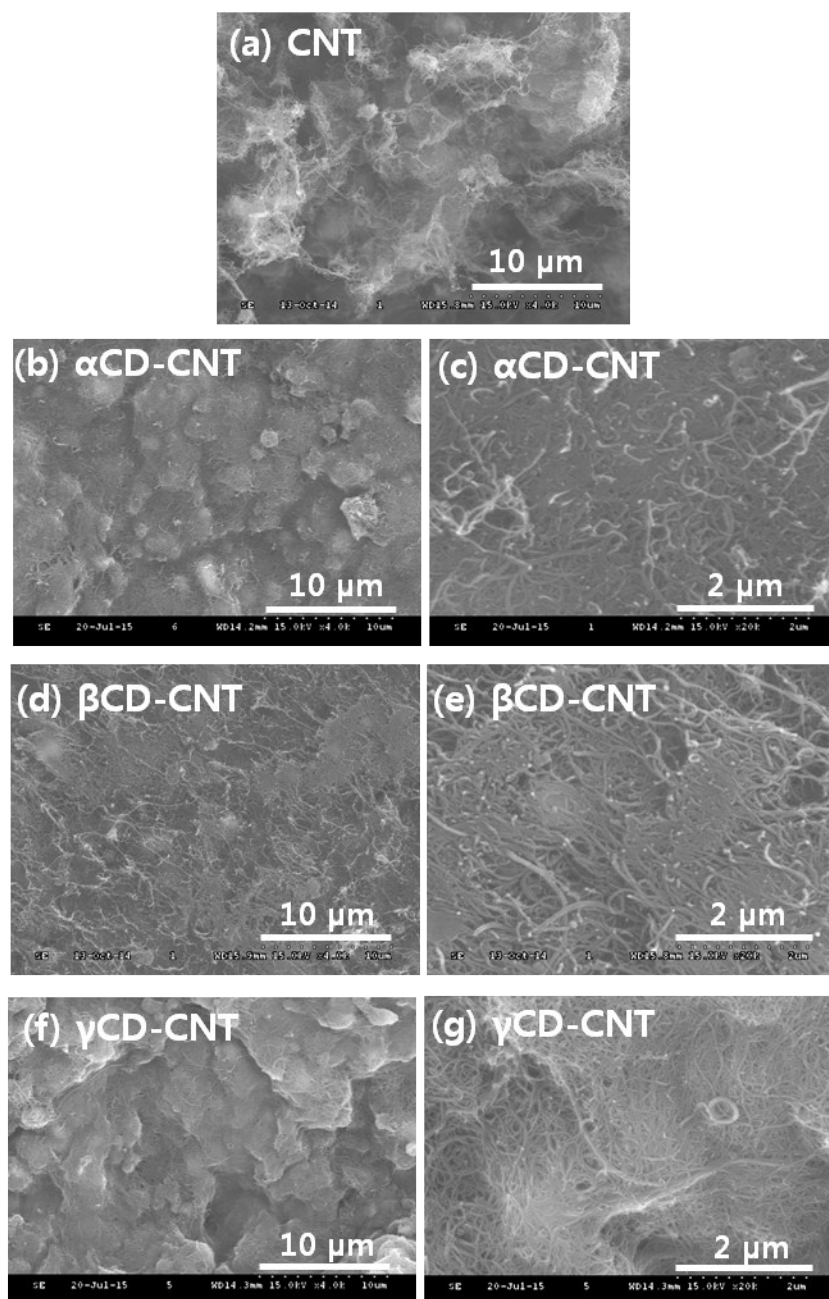

Fig. S3: The SEM images of CNT,  $\alpha$ CD-CNT,  $\beta$ CD-CNT, and  $\gamma$ CD-CNT composite films.

The SEM images permit identification of the strand-like one dimensional structure of CNT very well. When the  $\alpha$ CD-CNT and  $\gamma$ CD-CNT composite films are compared, more cyclodextrin is evident in the  $\gamma$ CD-CNT composite film, as shown in Fig. S3(f) and (g).

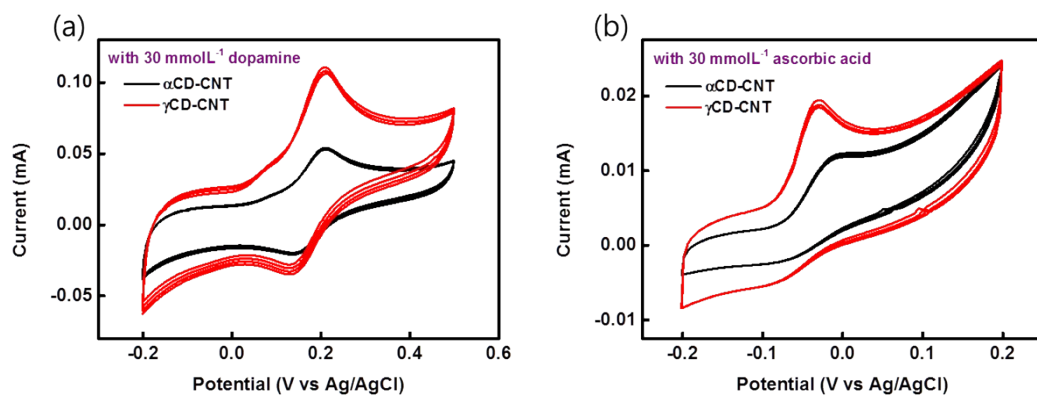

Fig. S4: The cyclic voltammetry (CV) results of the sample with (a) dopamine and (b) ascorbic acid.

The cyclic voltammetry (CV) results show that the currents measured for  $\gamma$ CD-CNT are much higher than observed for  $\alpha$ CD-CNT in the experiments with both dopamine and ascorbic acid.

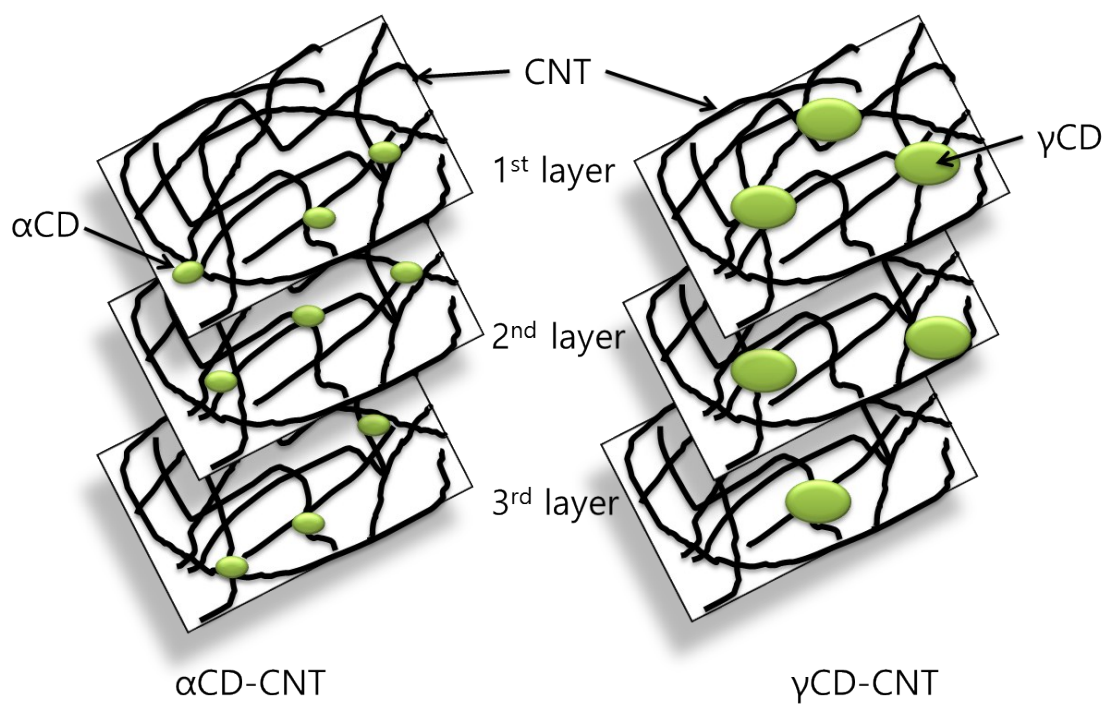

Fig. S5: A schematic of the  $\alpha$ CD-CNT and  $\gamma$ CD-CNT composite films.

Fig. S5 is a schematic of the composite films. The different size of cyclodextrin (CD) is indicated and the number of CD in each layer is suggested by the data (see main manuscript). The number of CD in each layer of the  $\alpha$ CD-CNT is the same, at least with in the surface and selvedge region but is reduced (schematically represented by a reduction from three to one CD) in  $\gamma$ CD-CNT. The latter occurs because of the bigger size of  $\gamma$ CD.
